# Supplementary material for: An efficient computational chemistry approach to generating negative data for drug discovery pipeline validation
Source: Front Bioinform. 2026 Feb 27;6:1756279. doi: 10.3389/fbinf.2026.1756279 (PMC12982188; doi:10.3389/fbinf.2026.1756279)
Supplement: Supplementary file 2 [file Table1.xlsx]

## Sheet: PDBbind
pair	status
prot_1fcx_lig_1fcx	binding
prot_1fcx_lig_1g74	nonbinding
prot_1fcx_lig_2p3i	nonbinding
prot_1fcx_lig_2zdl	nonbinding
prot_1fcx_lig_3ubd	nonbinding
prot_1fcx_lig_3vha	nonbinding
prot_1fcx_lig_3vhd	nonbinding
prot_1fcx_lig_4g0z	nonbinding
prot_1fcx_lig_4lov	nonbinding
prot_1fcx_lig_4qb3	nonbinding
prot_1fcx_lig_4tu4	nonbinding
prot_1fcx_lig_5dlx	nonbinding
prot_1fcx_lig_5fh7	nonbinding
prot_1fcx_lig_5fut	nonbinding
prot_1fcx_lig_5ia3	nonbinding
prot_1fcx_lig_5m28	nonbinding
prot_1fcx_lig_5nk6	nonbinding
prot_1fcx_lig_5wmg	nonbinding
prot_1fcx_lig_5y8y	nonbinding
prot_1fcx_lig_5zyl	nonbinding
prot_1fcx_lig_6g27	nonbinding
prot_1fcx_lig_6gjj	nonbinding
prot_1fcx_lig_6gjm	nonbinding
prot_1fcx_lig_6q3y	nonbinding
prot_1fcx_lig_6qln	nonbinding
prot_1fcx_lig_6t1o	nonbinding
prot_1g74_lig_1fcx	nonbinding
prot_1g74_lig_1g74	binding
prot_1g74_lig_2xjx	nonbinding
prot_1g74_lig_2zdl	nonbinding
prot_1g74_lig_3ubd	nonbinding
prot_1g74_lig_3vha	nonbinding
prot_1g74_lig_3vhd	nonbinding
prot_1g74_lig_4g0z	nonbinding
prot_1g74_lig_4lov	nonbinding
prot_1g74_lig_4tu4	nonbinding
prot_1g74_lig_5dlx	nonbinding
prot_1g74_lig_5fh7	nonbinding
prot_1g74_lig_5fut	nonbinding
prot_1g74_lig_5ia3	nonbinding
prot_1g74_lig_5jq5	nonbinding
prot_1g74_lig_5m28	nonbinding
prot_1g74_lig_5nk6	nonbinding
prot_1g74_lig_5wmg	nonbinding
prot_1g74_lig_5y8y	nonbinding
prot_1g74_lig_5zyg	nonbinding
prot_1g74_lig_5zyl	nonbinding
prot_1g74_lig_6g27	nonbinding
prot_1g74_lig_6gjj	nonbinding
prot_1g74_lig_6q3y	nonbinding
prot_1g74_lig_6qln	nonbinding
prot_1g74_lig_6t1o	nonbinding
prot_2p3i_lig_1fcx	nonbinding
prot_2p3i_lig_1g74	nonbinding
prot_2p3i_lig_2p3i	binding
prot_2p3i_lig_2xjx	nonbinding
prot_2p3i_lig_3ubd	nonbinding
prot_2p3i_lig_3vha	nonbinding
prot_2p3i_lig_3vhd	nonbinding
prot_2p3i_lig_4lov	nonbinding
prot_2p3i_lig_4qb3	nonbinding
prot_2p3i_lig_5dlx	nonbinding
prot_2p3i_lig_5fh7	nonbinding
prot_2p3i_lig_5fut	nonbinding
prot_2p3i_lig_5ia3	nonbinding
prot_2p3i_lig_5jq5	nonbinding
prot_2p3i_lig_5m28	nonbinding
prot_2p3i_lig_5nk6	nonbinding
prot_2p3i_lig_5wmg	nonbinding
prot_2p3i_lig_5y8y	nonbinding
prot_2p3i_lig_5zyg	nonbinding
prot_2p3i_lig_5zyl	nonbinding
prot_2p3i_lig_6g27	nonbinding
prot_2p3i_lig_6gjj	nonbinding
prot_2p3i_lig_6gjm	nonbinding
prot_2p3i_lig_6q3y	nonbinding
prot_2p3i_lig_6qln	nonbinding
prot_2p3i_lig_6t1o	nonbinding
prot_2xjx_lig_1fcx	nonbinding
prot_2xjx_lig_1g74	nonbinding
prot_2xjx_lig_2p3i	nonbinding
prot_2xjx_lig_2xjx	binding
prot_2xjx_lig_2zdl	nonbinding
prot_2xjx_lig_3ubd	nonbinding
prot_2xjx_lig_3vha	binding
prot_2xjx_lig_3vhd	binding
prot_2xjx_lig_4g0z	nonbinding
prot_2xjx_lig_4lov	nonbinding
prot_2xjx_lig_4qb3	nonbinding
prot_2xjx_lig_4tu4	nonbinding
prot_2xjx_lig_5dlx	nonbinding
prot_2xjx_lig_5fh7	nonbinding
prot_2xjx_lig_5fut	nonbinding
prot_2xjx_lig_5ia3	nonbinding
prot_2xjx_lig_5jq5	nonbinding
prot_2xjx_lig_5m28	nonbinding
prot_2xjx_lig_5nk6	nonbinding
prot_2xjx_lig_5wmg	nonbinding
prot_2xjx_lig_5zyl	nonbinding
prot_2xjx_lig_6g27	nonbinding
prot_2xjx_lig_6gjj	nonbinding
prot_2xjx_lig_6gjm	nonbinding
prot_2xjx_lig_6q3y	nonbinding
prot_2xjx_lig_6t1o	nonbinding
prot_2zdl_lig_1g74	nonbinding
prot_2zdl_lig_2p3i	nonbinding
prot_2zdl_lig_2xjx	nonbinding
prot_2zdl_lig_2zdl	binding
prot_2zdl_lig_3ubd	nonbinding
prot_2zdl_lig_4g0z	nonbinding
prot_2zdl_lig_4lov	nonbinding
prot_2zdl_lig_4qb3	nonbinding
prot_2zdl_lig_4tu4	nonbinding
prot_2zdl_lig_5dlx	nonbinding
prot_2zdl_lig_5fh7	nonbinding
prot_2zdl_lig_5fut	nonbinding
prot_2zdl_lig_5ia3	nonbinding
prot_2zdl_lig_5jq5	nonbinding
prot_2zdl_lig_5m28	nonbinding
prot_2zdl_lig_5nk6	nonbinding
prot_2zdl_lig_5wmg	nonbinding
prot_2zdl_lig_5y8y	nonbinding
prot_2zdl_lig_5zyg	nonbinding
prot_2zdl_lig_5zyl	nonbinding
prot_2zdl_lig_6g27	nonbinding
prot_2zdl_lig_6gjj	nonbinding
prot_2zdl_lig_6gjm	nonbinding
prot_2zdl_lig_6q3y	nonbinding
prot_2zdl_lig_6qln	nonbinding
prot_2zdl_lig_6t1o	nonbinding
prot_3ubd_lig_1fcx	nonbinding
prot_3ubd_lig_1g74	nonbinding
prot_3ubd_lig_2p3i	nonbinding
prot_3ubd_lig_2xjx	nonbinding
prot_3ubd_lig_2zdl	nonbinding
prot_3ubd_lig_3ubd	binding
prot_3ubd_lig_3vha	nonbinding
prot_3ubd_lig_3vhd	nonbinding
prot_3ubd_lig_4g0z	nonbinding
prot_3ubd_lig_4qb3	nonbinding
prot_3ubd_lig_4tu4	nonbinding
prot_3ubd_lig_5dlx	nonbinding
prot_3ubd_lig_5fut	nonbinding
prot_3ubd_lig_5ia3	nonbinding
prot_3ubd_lig_5jq5	nonbinding
prot_3ubd_lig_5m28	nonbinding
prot_3ubd_lig_5nk6	nonbinding
prot_3ubd_lig_5wmg	nonbinding
prot_3ubd_lig_5y8y	nonbinding
prot_3ubd_lig_5zyg	nonbinding
prot_3ubd_lig_5zyl	nonbinding
prot_3ubd_lig_6gjj	nonbinding
prot_3ubd_lig_6gjm	nonbinding
prot_3ubd_lig_6q3y	nonbinding
prot_3ubd_lig_6qln	nonbinding
prot_3ubd_lig_6t1o	nonbinding
prot_3vha_lig_1g74	nonbinding
prot_3vha_lig_2p3i	nonbinding
prot_3vha_lig_2xjx	binding
prot_3vha_lig_2zdl	nonbinding
prot_3vha_lig_3ubd	nonbinding
prot_3vha_lig_3vha	binding
prot_3vha_lig_4g0z	nonbinding
prot_3vha_lig_4lov	nonbinding
prot_3vha_lig_4qb3	nonbinding
prot_3vha_lig_4tu4	nonbinding
prot_3vha_lig_5dlx	nonbinding
prot_3vha_lig_5fh7	nonbinding
prot_3vha_lig_5fut	nonbinding
prot_3vha_lig_5ia3	nonbinding
prot_3vha_lig_5m28	nonbinding
prot_3vha_lig_5nk6	nonbinding
prot_3vha_lig_5wmg	nonbinding
prot_3vha_lig_5y8y	nonbinding
prot_3vha_lig_5zyg	nonbinding
prot_3vha_lig_5zyl	nonbinding
prot_3vha_lig_6g27	nonbinding
prot_3vha_lig_6gjj	nonbinding
prot_3vha_lig_6gjm	nonbinding
prot_3vha_lig_6q3y	nonbinding
prot_3vha_lig_6qln	nonbinding
prot_3vha_lig_6t1o	nonbinding
prot_3vhd_lig_1g74	nonbinding
prot_3vhd_lig_2p3i	nonbinding
prot_3vhd_lig_2zdl	nonbinding
prot_3vhd_lig_3ubd	nonbinding
prot_3vhd_lig_3vha	binding
prot_3vhd_lig_3vhd	binding
prot_3vhd_lig_4g0z	nonbinding
prot_3vhd_lig_4lov	nonbinding
prot_3vhd_lig_4qb3	nonbinding
prot_3vhd_lig_4tu4	nonbinding
prot_3vhd_lig_5dlx	nonbinding
prot_3vhd_lig_5fh7	nonbinding
prot_3vhd_lig_5fut	nonbinding
prot_3vhd_lig_5ia3	nonbinding
prot_3vhd_lig_5m28	nonbinding
prot_3vhd_lig_5nk6	nonbinding
prot_3vhd_lig_5wmg	nonbinding
prot_3vhd_lig_5y8y	nonbinding
prot_3vhd_lig_5zyg	nonbinding
prot_3vhd_lig_5zyl	nonbinding
prot_3vhd_lig_6g27	nonbinding
prot_3vhd_lig_6gjj	nonbinding
prot_3vhd_lig_6gjm	nonbinding
prot_3vhd_lig_6q3y	nonbinding
prot_3vhd_lig_6qln	nonbinding
prot_3vhd_lig_6t1o	nonbinding
prot_4g0z_lig_1fcx	nonbinding
prot_4g0z_lig_1g74	nonbinding
prot_4g0z_lig_2p3i	nonbinding
prot_4g0z_lig_2xjx	nonbinding
prot_4g0z_lig_3ubd	nonbinding
prot_4g0z_lig_3vhd	nonbinding
prot_4g0z_lig_4g0z	binding
prot_4g0z_lig_4lov	nonbinding
prot_4g0z_lig_4qb3	nonbinding
prot_4g0z_lig_5dlx	nonbinding
prot_4g0z_lig_5fh7	nonbinding
prot_4g0z_lig_5fut	nonbinding
prot_4g0z_lig_5ia3	nonbinding
prot_4g0z_lig_5jq5	nonbinding
prot_4g0z_lig_5m28	nonbinding
prot_4g0z_lig_5nk6	nonbinding
prot_4g0z_lig_5wmg	nonbinding
prot_4g0z_lig_5y8y	nonbinding
prot_4g0z_lig_5zyg	nonbinding
prot_4g0z_lig_5zyl	nonbinding
prot_4g0z_lig_6g27	nonbinding
prot_4g0z_lig_6gjj	nonbinding
prot_4g0z_lig_6gjm	nonbinding
prot_4g0z_lig_6q3y	nonbinding
prot_4g0z_lig_6qln	nonbinding
prot_4g0z_lig_6t1o	nonbinding
prot_4lov_lig_1fcx	nonbinding
prot_4lov_lig_2p3i	nonbinding
prot_4lov_lig_2xjx	nonbinding
prot_4lov_lig_2zdl	nonbinding
prot_4lov_lig_3ubd	nonbinding
prot_4lov_lig_3vha	nonbinding
prot_4lov_lig_3vhd	nonbinding
prot_4lov_lig_4g0z	nonbinding
prot_4lov_lig_4lov	binding
prot_4lov_lig_4qb3	nonbinding
prot_4lov_lig_4tu4	nonbinding
prot_4lov_lig_5dlx	nonbinding
prot_4lov_lig_5fh7	nonbinding
prot_4lov_lig_5fut	nonbinding
prot_4lov_lig_5ia3	nonbinding
prot_4lov_lig_5jq5	nonbinding
prot_4lov_lig_5m28	nonbinding
prot_4lov_lig_5nk6	nonbinding
prot_4lov_lig_5wmg	nonbinding
prot_4lov_lig_5y8y	nonbinding
prot_4lov_lig_5zyg	nonbinding
prot_4lov_lig_5zyl	nonbinding
prot_4lov_lig_6g27	nonbinding
prot_4lov_lig_6q3y	nonbinding
prot_4lov_lig_6qln	nonbinding
prot_4lov_lig_6t1o	nonbinding
prot_4qb3_lig_1fcx	nonbinding
prot_4qb3_lig_1g74	nonbinding
prot_4qb3_lig_2xjx	nonbinding
prot_4qb3_lig_2zdl	nonbinding
prot_4qb3_lig_3ubd	nonbinding
prot_4qb3_lig_3vha	nonbinding
prot_4qb3_lig_3vhd	nonbinding
prot_4qb3_lig_4lov	nonbinding
prot_4qb3_lig_4qb3	binding
prot_4qb3_lig_5dlx	binding
prot_4qb3_lig_5fh7	nonbinding
prot_4qb3_lig_5fut	nonbinding
prot_4qb3_lig_5ia3	nonbinding
prot_4qb3_lig_5jq5	nonbinding
prot_4qb3_lig_5m28	nonbinding
prot_4qb3_lig_5nk6	nonbinding
prot_4qb3_lig_5wmg	binding
prot_4qb3_lig_5y8y	binding
prot_4qb3_lig_5zyg	nonbinding
prot_4qb3_lig_5zyl	nonbinding
prot_4qb3_lig_6g27	nonbinding
prot_4qb3_lig_6gjj	nonbinding
prot_4qb3_lig_6gjm	nonbinding
prot_4qb3_lig_6q3y	binding
prot_4qb3_lig_6qln	nonbinding
prot_4qb3_lig_6t1o	nonbinding
prot_4tu4_lig_1fcx	nonbinding
prot_4tu4_lig_1g74	nonbinding
prot_4tu4_lig_2p3i	nonbinding
prot_4tu4_lig_2xjx	nonbinding
prot_4tu4_lig_3ubd	nonbinding
prot_4tu4_lig_4g0z	nonbinding
prot_4tu4_lig_4lov	nonbinding
prot_4tu4_lig_4qb3	nonbinding
prot_4tu4_lig_4tu4	binding
prot_4tu4_lig_5dlx	nonbinding
prot_4tu4_lig_5fh7	nonbinding
prot_4tu4_lig_5fut	nonbinding
prot_4tu4_lig_5ia3	nonbinding
prot_4tu4_lig_5jq5	nonbinding
prot_4tu4_lig_5m28	nonbinding
prot_4tu4_lig_5nk6	nonbinding
prot_4tu4_lig_5wmg	nonbinding
prot_4tu4_lig_5y8y	nonbinding
prot_4tu4_lig_5zyg	nonbinding
prot_4tu4_lig_5zyl	nonbinding
prot_4tu4_lig_6g27	nonbinding
prot_4tu4_lig_6gjj	nonbinding
prot_4tu4_lig_6gjm	nonbinding
prot_4tu4_lig_6q3y	nonbinding
prot_4tu4_lig_6qln	nonbinding
prot_4tu4_lig_6t1o	nonbinding
prot_5dlx_lig_1fcx	nonbinding
prot_5dlx_lig_1g74	nonbinding
prot_5dlx_lig_2p3i	nonbinding
prot_5dlx_lig_2xjx	nonbinding
prot_5dlx_lig_2zdl	nonbinding
prot_5dlx_lig_3ubd	nonbinding
prot_5dlx_lig_3vha	nonbinding
prot_5dlx_lig_3vhd	nonbinding
prot_5dlx_lig_4g0z	nonbinding
prot_5dlx_lig_4lov	nonbinding
prot_5dlx_lig_4qb3	binding
prot_5dlx_lig_4tu4	nonbinding
prot_5dlx_lig_5dlx	binding
prot_5dlx_lig_5fh7	nonbinding
prot_5dlx_lig_5ia3	nonbinding
prot_5dlx_lig_5jq5	nonbinding
prot_5dlx_lig_5nk6	nonbinding
prot_5dlx_lig_5wmg	binding
prot_5dlx_lig_5y8y	binding
prot_5dlx_lig_5zyg	nonbinding
prot_5dlx_lig_5zyl	nonbinding
prot_5dlx_lig_6g27	nonbinding
prot_5dlx_lig_6gjj	nonbinding
prot_5dlx_lig_6gjm	nonbinding
prot_5dlx_lig_6qln	nonbinding
prot_5dlx_lig_6t1o	nonbinding
prot_5fh7_lig_1fcx	nonbinding
prot_5fh7_lig_2p3i	nonbinding
prot_5fh7_lig_2xjx	nonbinding
prot_5fh7_lig_2zdl	nonbinding
prot_5fh7_lig_3ubd	nonbinding
prot_5fh7_lig_3vha	nonbinding
prot_5fh7_lig_3vhd	nonbinding
prot_5fh7_lig_4g0z	nonbinding
prot_5fh7_lig_4qb3	nonbinding
prot_5fh7_lig_4tu4	nonbinding
prot_5fh7_lig_5dlx	nonbinding
prot_5fh7_lig_5fh7	binding
prot_5fh7_lig_5fut	nonbinding
prot_5fh7_lig_5ia3	nonbinding
prot_5fh7_lig_5jq5	nonbinding
prot_5fh7_lig_5m28	nonbinding
prot_5fh7_lig_5nk6	nonbinding
prot_5fh7_lig_5wmg	nonbinding
prot_5fh7_lig_5y8y	nonbinding
prot_5fh7_lig_5zyg	nonbinding
prot_5fh7_lig_5zyl	nonbinding
prot_5fh7_lig_6g27	nonbinding
prot_5fh7_lig_6gjm	nonbinding
prot_5fh7_lig_6q3y	nonbinding
prot_5fh7_lig_6qln	nonbinding
prot_5fh7_lig_6t1o	nonbinding
prot_5fut_lig_1fcx	nonbinding
prot_5fut_lig_1g74	nonbinding
prot_5fut_lig_2p3i	nonbinding
prot_5fut_lig_2xjx	nonbinding
prot_5fut_lig_2zdl	nonbinding
prot_5fut_lig_3vha	nonbinding
prot_5fut_lig_3vhd	nonbinding
prot_5fut_lig_4g0z	nonbinding
prot_5fut_lig_4lov	nonbinding
prot_5fut_lig_4qb3	nonbinding
prot_5fut_lig_4tu4	nonbinding
prot_5fut_lig_5dlx	nonbinding
prot_5fut_lig_5fh7	nonbinding
prot_5fut_lig_5fut	binding
prot_5fut_lig_5ia3	nonbinding
prot_5fut_lig_5jq5	nonbinding
prot_5fut_lig_5m28	nonbinding
prot_5fut_lig_5nk6	nonbinding
prot_5fut_lig_5wmg	nonbinding
prot_5fut_lig_5y8y	nonbinding
prot_5fut_lig_5zyg	nonbinding
prot_5fut_lig_5zyl	nonbinding
prot_5fut_lig_6gjj	nonbinding
prot_5fut_lig_6gjm	nonbinding
prot_5fut_lig_6qln	nonbinding
prot_5fut_lig_6t1o	nonbinding
prot_5ia3_lig_1fcx	nonbinding
prot_5ia3_lig_1g74	nonbinding
prot_5ia3_lig_2p3i	nonbinding
prot_5ia3_lig_2xjx	nonbinding
prot_5ia3_lig_2zdl	nonbinding
prot_5ia3_lig_3ubd	nonbinding
prot_5ia3_lig_3vha	nonbinding
prot_5ia3_lig_3vhd	nonbinding
prot_5ia3_lig_4g0z	nonbinding
prot_5ia3_lig_4lov	nonbinding
prot_5ia3_lig_4qb3	nonbinding
prot_5ia3_lig_4tu4	nonbinding
prot_5ia3_lig_5dlx	nonbinding
prot_5ia3_lig_5fh7	nonbinding
prot_5ia3_lig_5fut	nonbinding
prot_5ia3_lig_5ia3	binding
prot_5ia3_lig_5jq5	nonbinding
prot_5ia3_lig_5m28	nonbinding
prot_5ia3_lig_5wmg	nonbinding
prot_5ia3_lig_5y8y	nonbinding
prot_5ia3_lig_5zyg	nonbinding
prot_5ia3_lig_6g27	nonbinding
prot_5ia3_lig_6gjj	nonbinding
prot_5ia3_lig_6gjm	nonbinding
prot_5ia3_lig_6q3y	nonbinding
prot_5ia3_lig_6qln	nonbinding
prot_5jq5_lig_1fcx	nonbinding
prot_5jq5_lig_1g74	nonbinding
prot_5jq5_lig_2p3i	nonbinding
prot_5jq5_lig_2zdl	nonbinding
prot_5jq5_lig_3ubd	nonbinding
prot_5jq5_lig_3vha	nonbinding
prot_5jq5_lig_3vhd	nonbinding
prot_5jq5_lig_4g0z	nonbinding
prot_5jq5_lig_4lov	nonbinding
prot_5jq5_lig_4qb3	nonbinding
prot_5jq5_lig_4tu4	nonbinding
prot_5jq5_lig_5dlx	nonbinding
prot_5jq5_lig_5fh7	nonbinding
prot_5jq5_lig_5fut	nonbinding
prot_5jq5_lig_5ia3	nonbinding
prot_5jq5_lig_5jq5	binding
prot_5jq5_lig_5m28	nonbinding
prot_5jq5_lig_5nk6	nonbinding
prot_5jq5_lig_5wmg	nonbinding
prot_5jq5_lig_5zyl	nonbinding
prot_5jq5_lig_6g27	nonbinding
prot_5jq5_lig_6gjj	nonbinding
prot_5jq5_lig_6gjm	nonbinding
prot_5jq5_lig_6q3y	nonbinding
prot_5jq5_lig_6qln	nonbinding
prot_5jq5_lig_6t1o	nonbinding
prot_5m28_lig_1fcx	nonbinding
prot_5m28_lig_1g74	nonbinding
prot_5m28_lig_2p3i	nonbinding
prot_5m28_lig_2xjx	nonbinding
prot_5m28_lig_2zdl	nonbinding
prot_5m28_lig_3vha	nonbinding
prot_5m28_lig_3vhd	nonbinding
prot_5m28_lig_4g0z	nonbinding
prot_5m28_lig_4lov	nonbinding
prot_5m28_lig_4qb3	nonbinding
prot_5m28_lig_4tu4	nonbinding
prot_5m28_lig_5dlx	nonbinding
prot_5m28_lig_5fh7	nonbinding
prot_5m28_lig_5ia3	nonbinding
prot_5m28_lig_5jq5	nonbinding
prot_5m28_lig_5m28	binding
prot_5m28_lig_5nk6	nonbinding
prot_5m28_lig_5wmg	nonbinding
prot_5m28_lig_5y8y	nonbinding
prot_5m28_lig_5zyg	nonbinding
prot_5m28_lig_5zyl	nonbinding
prot_5m28_lig_6g27	nonbinding
prot_5m28_lig_6gjj	nonbinding
prot_5m28_lig_6gjm	nonbinding
prot_5m28_lig_6qln	nonbinding
prot_5m28_lig_6t1o	nonbinding
prot_5nk6_lig_1fcx	nonbinding
prot_5nk6_lig_1g74	nonbinding
prot_5nk6_lig_2p3i	nonbinding
prot_5nk6_lig_2xjx	nonbinding
prot_5nk6_lig_2zdl	nonbinding
prot_5nk6_lig_3ubd	nonbinding
prot_5nk6_lig_3vha	nonbinding
prot_5nk6_lig_3vhd	nonbinding
prot_5nk6_lig_4g0z	nonbinding
prot_5nk6_lig_4lov	nonbinding
prot_5nk6_lig_4qb3	nonbinding
prot_5nk6_lig_4tu4	nonbinding
prot_5nk6_lig_5fh7	nonbinding
prot_5nk6_lig_5ia3	binding
prot_5nk6_lig_5jq5	nonbinding
prot_5nk6_lig_5nk6	binding
prot_5nk6_lig_5wmg	nonbinding
prot_5nk6_lig_5y8y	nonbinding
prot_5nk6_lig_5zyg	nonbinding
prot_5nk6_lig_5zyl	nonbinding
prot_5nk6_lig_6g27	nonbinding
prot_5nk6_lig_6gjj	nonbinding
prot_5nk6_lig_6gjm	nonbinding
prot_5nk6_lig_6q3y	nonbinding
prot_5nk6_lig_6qln	nonbinding
prot_5nk6_lig_6t1o	nonbinding
prot_5wmg_lig_1fcx	nonbinding
prot_5wmg_lig_1g74	nonbinding
prot_5wmg_lig_2p3i	nonbinding
prot_5wmg_lig_2xjx	nonbinding
prot_5wmg_lig_2zdl	nonbinding
prot_5wmg_lig_3ubd	nonbinding
prot_5wmg_lig_3vha	nonbinding
prot_5wmg_lig_3vhd	nonbinding
prot_5wmg_lig_4g0z	nonbinding
prot_5wmg_lig_4lov	nonbinding
prot_5wmg_lig_4qb3	binding
prot_5wmg_lig_4tu4	nonbinding
prot_5wmg_lig_5dlx	binding
prot_5wmg_lig_5fh7	nonbinding
prot_5wmg_lig_5fut	nonbinding
prot_5wmg_lig_5jq5	nonbinding
prot_5wmg_lig_5m28	nonbinding
prot_5wmg_lig_5nk6	nonbinding
prot_5wmg_lig_5wmg	binding
prot_5wmg_lig_5y8y	binding
prot_5wmg_lig_5zyg	nonbinding
prot_5wmg_lig_6g27	nonbinding
prot_5wmg_lig_6gjj	nonbinding
prot_5wmg_lig_6gjm	nonbinding
prot_5wmg_lig_6q3y	binding
prot_5wmg_lig_6qln	nonbinding
prot_5y8y_lig_1fcx	nonbinding
prot_5y8y_lig_1g74	nonbinding
prot_5y8y_lig_2p3i	nonbinding
prot_5y8y_lig_2xjx	nonbinding
prot_5y8y_lig_2zdl	nonbinding
prot_5y8y_lig_3ubd	nonbinding
prot_5y8y_lig_3vha	nonbinding
prot_5y8y_lig_3vhd	nonbinding
prot_5y8y_lig_4g0z	nonbinding
prot_5y8y_lig_4lov	nonbinding
prot_5y8y_lig_4qb3	binding
prot_5y8y_lig_4tu4	nonbinding
prot_5y8y_lig_5dlx	binding
prot_5y8y_lig_5fh7	nonbinding
prot_5y8y_lig_5fut	nonbinding
prot_5y8y_lig_5jq5	nonbinding
prot_5y8y_lig_5m28	nonbinding
prot_5y8y_lig_5nk6	nonbinding
prot_5y8y_lig_5y8y	binding
prot_5y8y_lig_5zyg	nonbinding
prot_5y8y_lig_5zyl	nonbinding
prot_5y8y_lig_6g27	nonbinding
prot_5y8y_lig_6gjj	nonbinding
prot_5y8y_lig_6gjm	nonbinding
prot_5y8y_lig_6q3y	binding
prot_5y8y_lig_6t1o	nonbinding
prot_5zyg_lig_1fcx	nonbinding
prot_5zyg_lig_1g74	nonbinding
prot_5zyg_lig_2p3i	nonbinding
prot_5zyg_lig_2xjx	nonbinding
prot_5zyg_lig_2zdl	nonbinding
prot_5zyg_lig_3ubd	nonbinding
prot_5zyg_lig_3vha	nonbinding
prot_5zyg_lig_3vhd	nonbinding
prot_5zyg_lig_4g0z	nonbinding
prot_5zyg_lig_4lov	nonbinding
prot_5zyg_lig_4qb3	nonbinding
prot_5zyg_lig_4tu4	nonbinding
prot_5zyg_lig_5dlx	nonbinding
prot_5zyg_lig_5fh7	nonbinding
prot_5zyg_lig_5fut	nonbinding
prot_5zyg_lig_5ia3	nonbinding
prot_5zyg_lig_5jq5	nonbinding
prot_5zyg_lig_5m28	nonbinding
prot_5zyg_lig_5nk6	nonbinding
prot_5zyg_lig_5zyg	binding
prot_5zyg_lig_5zyl	binding
prot_5zyg_lig_6g27	nonbinding
prot_5zyg_lig_6gjj	nonbinding
prot_5zyg_lig_6gjm	nonbinding
prot_5zyg_lig_6q3y	nonbinding
prot_5zyg_lig_6t1o	nonbinding
prot_5zyl_lig_1fcx	nonbinding
prot_5zyl_lig_1g74	nonbinding
prot_5zyl_lig_2p3i	nonbinding
prot_5zyl_lig_2xjx	nonbinding
prot_5zyl_lig_2zdl	nonbinding
prot_5zyl_lig_3ubd	nonbinding
prot_5zyl_lig_3vha	nonbinding
prot_5zyl_lig_3vhd	nonbinding
prot_5zyl_lig_4g0z	nonbinding
prot_5zyl_lig_4lov	nonbinding
prot_5zyl_lig_4qb3	nonbinding
prot_5zyl_lig_4tu4	nonbinding
prot_5zyl_lig_5fh7	nonbinding
prot_5zyl_lig_5fut	nonbinding
prot_5zyl_lig_5ia3	nonbinding
prot_5zyl_lig_5jq5	nonbinding
prot_5zyl_lig_5m28	nonbinding
prot_5zyl_lig_5wmg	nonbinding
prot_5zyl_lig_5y8y	nonbinding
prot_5zyl_lig_5zyg	binding
prot_5zyl_lig_5zyl	binding
prot_5zyl_lig_6g27	nonbinding
prot_5zyl_lig_6gjj	nonbinding
prot_5zyl_lig_6gjm	nonbinding
prot_5zyl_lig_6q3y	nonbinding
prot_5zyl_lig_6qln	nonbinding
prot_6g27_lig_1fcx	nonbinding
prot_6g27_lig_1g74	nonbinding
prot_6g27_lig_2p3i	nonbinding
prot_6g27_lig_2xjx	nonbinding
prot_6g27_lig_2zdl	nonbinding
prot_6g27_lig_3ubd	nonbinding
prot_6g27_lig_3vha	nonbinding
prot_6g27_lig_3vhd	nonbinding
prot_6g27_lig_4g0z	nonbinding
prot_6g27_lig_4qb3	nonbinding
prot_6g27_lig_4tu4	nonbinding
prot_6g27_lig_5dlx	nonbinding
prot_6g27_lig_5fut	nonbinding
prot_6g27_lig_5ia3	nonbinding
prot_6g27_lig_5jq5	nonbinding
prot_6g27_lig_5m28	nonbinding
prot_6g27_lig_5nk6	nonbinding
prot_6g27_lig_5wmg	nonbinding
prot_6g27_lig_5y8y	nonbinding
prot_6g27_lig_5zyg	nonbinding
prot_6g27_lig_5zyl	nonbinding
prot_6g27_lig_6g27	binding
prot_6g27_lig_6gjm	nonbinding
prot_6g27_lig_6q3y	nonbinding
prot_6g27_lig_6qln	nonbinding
prot_6g27_lig_6t1o	nonbinding
prot_6gjj_lig_1fcx	nonbinding
prot_6gjj_lig_2p3i	nonbinding
prot_6gjj_lig_2xjx	nonbinding
prot_6gjj_lig_2zdl	nonbinding
prot_6gjj_lig_3ubd	nonbinding
prot_6gjj_lig_3vha	nonbinding
prot_6gjj_lig_3vhd	nonbinding
prot_6gjj_lig_4g0z	nonbinding
prot_6gjj_lig_4lov	nonbinding
prot_6gjj_lig_4tu4	nonbinding
prot_6gjj_lig_5dlx	nonbinding
prot_6gjj_lig_5fh7	nonbinding
prot_6gjj_lig_5fut	nonbinding
prot_6gjj_lig_5ia3	nonbinding
prot_6gjj_lig_5jq5	nonbinding
prot_6gjj_lig_5m28	nonbinding
prot_6gjj_lig_5nk6	nonbinding
prot_6gjj_lig_5wmg	nonbinding
prot_6gjj_lig_5y8y	nonbinding
prot_6gjj_lig_5zyg	nonbinding
prot_6gjj_lig_5zyl	nonbinding
prot_6gjj_lig_6g27	nonbinding
prot_6gjj_lig_6gjj	binding
prot_6gjj_lig_6q3y	nonbinding
prot_6gjj_lig_6qln	nonbinding
prot_6gjj_lig_6t1o	nonbinding
prot_6gjm_lig_1fcx	nonbinding
prot_6gjm_lig_1g74	nonbinding
prot_6gjm_lig_2xjx	nonbinding
prot_6gjm_lig_2zdl	nonbinding
prot_6gjm_lig_3ubd	nonbinding
prot_6gjm_lig_3vha	nonbinding
prot_6gjm_lig_3vhd	nonbinding
prot_6gjm_lig_4lov	nonbinding
prot_6gjm_lig_4tu4	nonbinding
prot_6gjm_lig_5dlx	nonbinding
prot_6gjm_lig_5fh7	nonbinding
prot_6gjm_lig_5fut	nonbinding
prot_6gjm_lig_5ia3	nonbinding
prot_6gjm_lig_5jq5	nonbinding
prot_6gjm_lig_5m28	nonbinding
prot_6gjm_lig_5nk6	nonbinding
prot_6gjm_lig_5wmg	nonbinding
prot_6gjm_lig_5y8y	nonbinding
prot_6gjm_lig_5zyg	nonbinding
prot_6gjm_lig_5zyl	nonbinding
prot_6gjm_lig_6g27	nonbinding
prot_6gjm_lig_6gjj	binding
prot_6gjm_lig_6gjm	binding
prot_6gjm_lig_6q3y	nonbinding
prot_6gjm_lig_6qln	nonbinding
prot_6gjm_lig_6t1o	nonbinding
prot_6q3y_lig_1fcx	nonbinding
prot_6q3y_lig_1g74	nonbinding
prot_6q3y_lig_2p3i	nonbinding
prot_6q3y_lig_2xjx	nonbinding
prot_6q3y_lig_2zdl	nonbinding
prot_6q3y_lig_3vha	nonbinding
prot_6q3y_lig_3vhd	nonbinding
prot_6q3y_lig_4g0z	nonbinding
prot_6q3y_lig_4lov	nonbinding
prot_6q3y_lig_4qb3	binding
prot_6q3y_lig_4tu4	nonbinding
prot_6q3y_lig_5dlx	binding
prot_6q3y_lig_5fut	nonbinding
prot_6q3y_lig_5ia3	nonbinding
prot_6q3y_lig_5jq5	nonbinding
prot_6q3y_lig_5m28	nonbinding
prot_6q3y_lig_5nk6	nonbinding
prot_6q3y_lig_5wmg	binding
prot_6q3y_lig_5y8y	binding
prot_6q3y_lig_5zyg	nonbinding
prot_6q3y_lig_5zyl	nonbinding
prot_6q3y_lig_6gjj	nonbinding
prot_6q3y_lig_6gjm	nonbinding
prot_6q3y_lig_6q3y	binding
prot_6q3y_lig_6qln	nonbinding
prot_6q3y_lig_6t1o	nonbinding
prot_6qln_lig_1fcx	nonbinding
prot_6qln_lig_1g74	nonbinding
prot_6qln_lig_2p3i	nonbinding
prot_6qln_lig_2xjx	nonbinding
prot_6qln_lig_2zdl	nonbinding
prot_6qln_lig_3ubd	nonbinding
prot_6qln_lig_3vha	nonbinding
prot_6qln_lig_3vhd	nonbinding
prot_6qln_lig_4g0z	nonbinding
prot_6qln_lig_4lov	nonbinding
prot_6qln_lig_4qb3	nonbinding
prot_6qln_lig_4tu4	nonbinding
prot_6qln_lig_5dlx	nonbinding
prot_6qln_lig_5fh7	nonbinding
prot_6qln_lig_5fut	nonbinding
prot_6qln_lig_5jq5	nonbinding
prot_6qln_lig_5m28	nonbinding
prot_6qln_lig_5nk6	nonbinding
prot_6qln_lig_5y8y	nonbinding
prot_6qln_lig_5zyg	nonbinding
prot_6qln_lig_6g27	nonbinding
prot_6qln_lig_6gjj	nonbinding
prot_6qln_lig_6gjm	nonbinding
prot_6qln_lig_6q3y	nonbinding
prot_6qln_lig_6qln	binding
prot_6qln_lig_6t1o	nonbinding
prot_6t1o_lig_1fcx	nonbinding
prot_6t1o_lig_1g74	nonbinding
prot_6t1o_lig_2p3i	nonbinding
prot_6t1o_lig_2xjx	nonbinding
prot_6t1o_lig_2zdl	nonbinding
prot_6t1o_lig_3ubd	nonbinding
prot_6t1o_lig_3vha	nonbinding
prot_6t1o_lig_3vhd	nonbinding
prot_6t1o_lig_4g0z	nonbinding
prot_6t1o_lig_4lov	nonbinding
prot_6t1o_lig_4qb3	nonbinding
prot_6t1o_lig_4tu4	nonbinding
prot_6t1o_lig_5fh7	nonbinding
prot_6t1o_lig_5fut	nonbinding
prot_6t1o_lig_5ia3	nonbinding
prot_6t1o_lig_5jq5	nonbinding
prot_6t1o_lig_5wmg	nonbinding
prot_6t1o_lig_5y8y	nonbinding
prot_6t1o_lig_5zyg	nonbinding
prot_6t1o_lig_5zyl	nonbinding
prot_6t1o_lig_6g27	nonbinding
prot_6t1o_lig_6gjj	nonbinding
prot_6t1o_lig_6gjm	nonbinding
prot_6t1o_lig_6q3y	nonbinding
prot_6t1o_lig_6qln	nonbinding
prot_6t1o_lig_6t1o	binding

## Sheet: MAYGEN
SMILES	ligand
CC1=CN(C(=O)NC1=O)[C@H]2[C@@H]([C@@H]([C@H](O2)CO)O)O	4QSW
NCC(O)(CN)C(C#CC#CC(O)(O)O)=C(O)O	4qsw_decoy_1
NCC(O)(C#CC#CC(=C(O)O)C(O)(O)O)CN	4qsw_decoy_2
NCC(O)(C#CC(C#CC(O)(O)O)=C(O)O)CN	4qsw_decoy_3
NCC(O)(CN)C(O)=C(O)C#CC#CC(O)(O)O	4qsw_decoy_4
NCC(O)(CN)C(O)=C(C#CC#CO)C(O)(O)O	4qsw_decoy_5
NCC(O)(CN)C(O)=C(C#CO)C#CC(O)(O)O	4qsw_decoy_6
NCC(O)(C#CC#CC(O)=C(O)C(O)(O)O)CN	4qsw_decoy_7
NCC(O)(CN)C(C#CC#CO)=C(O)C(O)(O)O	4qsw_decoy_8
NCC(O)(C#CC(C#CO)=C(O)C(O)(O)O)CN	4qsw_decoy_9
NCC(O)(CN)C(=C(O)C#CC#CO)C(O)(O)O	4qsw_decoy_10
NCC(O)(CN)C(=C(C#CO)C#CO)C(O)(O)O	4qsw_decoy_11
NCC(O)(C#CC(O)=C(O)C#CC(O)(O)O)CN	4qsw_decoy_12
NCC(O)(CN)C(C#CC(O)(O)O)=C(O)C#CO	4qsw_decoy_13
NCC(O)(CN)C(C#CO)=C(O)C#CC(O)(O)O	4qsw_decoy_14
NCC(O)(C#CC(=C(O)C#CO)C(O)(O)O)CN	4qsw_decoy_15
NCC(O)(C#CC(O)=C(C#CO)C(O)(O)O)CN	4qsw_decoy_16
NCC(O)(CN)C(C#CO)=C(C#CO)C(O)(O)O	4qsw_decoy_17
NCC(O)(CN)C(O)(O)C#CC#CC(O)=C(O)O	4qsw_decoy_18
NCC(O)(CN)C(O)(O)C(C#CC#CO)=C(O)O	4qsw_decoy_19
NCC(O)(CN)C(O)(O)C#CC(C#CO)=C(O)O	4qsw_decoy_20
NCC(O)(C#CC#CC(O)(O)C(O)=C(O)O)CN	4qsw_decoy_21
NCC(O)(C#CC(O)(O)C#CC(O)=C(O)O)CN	4qsw_decoy_22
NCC(O)(CN)C(=C(O)O)C(O)(O)C#CC#CO	4qsw_decoy_23
NCC(O)(CN)C(C#CC(O)(O)C#CO)=C(O)O	4qsw_decoy_24
NCC(O)(C#CC(=C(O)O)C(O)(O)C#CO)CN	4qsw_decoy_25
CC(=O)NCCCC[C@@H](C(=O)NC)NC(=O)C	5A5N
CC(=C(C#CC(C)(C)C)C(N)(N)N)C(O)(O)O	5a5n_decoy_1
CC(=C(C#CC(N)(N)N)C(C)(C)C)C(O)(O)O	5a5n_decoy_2
CC(=C(C#CC(C)(C)C)C(O)(O)O)C(N)(N)N	5a5n_decoy_3
CC(=C(C#CC(O)(O)O)C(C)(C)C)C(N)(N)N	5a5n_decoy_4
CC(C#CC(C)(C)C)=C(C(N)(N)N)C(O)(O)O	5a5n_decoy_5
CC#CC(=C(C(N)(N)N)C(O)(O)O)C(C)(C)C	5a5n_decoy_6
CC(=C(C#CC(N)(N)N)C(O)(O)O)C(C)(C)C	5a5n_decoy_7
CC(=C(C#CC(O)(O)O)C(N)(N)N)C(C)(C)C	5a5n_decoy_8
CC(C#CC(N)(N)N)=C(C(C)(C)C)C(O)(O)O	5a5n_decoy_9
CC#CC(=C(C(C)(C)C)C(O)(O)O)C(N)(N)N	5a5n_decoy_10
CC(C#CC(O)(O)O)=C(C(C)(C)C)C(N)(N)N	5a5n_decoy_11
CC#CC(=C(C(C)(C)C)C(N)(N)N)C(O)(O)O	5a5n_decoy_12
CC(C)=C(C#CC(C)(C)C(O)(O)O)C(N)(N)N	5a5n_decoy_13
CC(C)=C(C#CC(N)(N)N)C(C)(C)C(O)(O)O	5a5n_decoy_14
CC(C)=C(C#CC(C)(C)C(N)(N)N)C(O)(O)O	5a5n_decoy_15
CC(C)=C(C#CC(O)(O)O)C(C)(C)C(N)(N)N	5a5n_decoy_16
CC(C)=C(C(O)(O)O)C(C)(C)C#CC(N)(N)N	5a5n_decoy_17
CC(C)=C(C(N)(N)N)C(C)(C)C#CC(O)(O)O	5a5n_decoy_18
CC(C#CC(C)(C)C(O)(O)O)=C(C)C(N)(N)N	5a5n_decoy_19
CC#CC(=C(C)C(N)(N)N)C(C)(C)C(O)(O)O	5a5n_decoy_20
CC(C#CC(N)(N)N)=C(C)C(C)(C)C(O)(O)O	5a5n_decoy_21
CC#CC(=C(C)C(C)(C)C(O)(O)O)C(N)(N)N	5a5n_decoy_22
CC#CC(C)=C(C(N)(N)N)C(C)(C)C(O)(O)O	5a5n_decoy_23
CC(C#CC(C)(C)C(N)(N)N)=C(C)C(O)(O)O	5a5n_decoy_24
CC#CC(=C(C)C(O)(O)O)C(C)(C)C(N)(N)N	5a5n_decoy_25
CC(=O)c1csc(n1)NC(=O)[C@@H]2CNCCN2	6EPU
CC(O)(S)C(N)(N)C#CC#CC#CC(N)(N)O	6epu_decoy_1
CC(O)(S)C#CC#CC#CC(N)(N)C(N)(N)O	6epu_decoy_2
CC(O)(S)C#CC(N)(N)C#CC#CC(N)(N)O	6epu_decoy_3
CC(O)(S)C#CC#CC(N)(N)C#CC(N)(N)O	6epu_decoy_4
CC(O)(S)C(N)(C#CC#CC#CN)C(N)(N)O	6epu_decoy_5
CC(O)(S)C(N)(C#CN)C#CC#CC(N)(N)O	6epu_decoy_6
CC(O)(S)C(N)(C#CC#CN)C#CC(N)(N)O	6epu_decoy_7
CC(O)(S)C#CC#CC(N)(C#CN)C(N)(N)O	6epu_decoy_8
CC(O)(S)C#CC(N)(C#CC#CN)C(N)(N)O	6epu_decoy_9
CC(O)(S)C(C#CN)(C#CC#CN)C(N)(N)O	6epu_decoy_10
CC(O)(S)C#CC(N)(C#CN)C#CC(N)(N)O	6epu_decoy_11
CC(O)(S)C(C#CN)(C#CN)C#CC(N)(N)O	6epu_decoy_12
CC(O)(S)C#CC(C#CN)(C#CN)C(N)(N)O	6epu_decoy_13
CC(O)(S)C(N)(O)C#CC#CC#CC(N)(N)N	6epu_decoy_14
CC(O)(S)C#CC#CC#CC(N)(O)C(N)(N)N	6epu_decoy_15
CC(O)(S)C#CC(N)(O)C#CC#CC(N)(N)N	6epu_decoy_16
CC(O)(S)C#CC#CC(N)(O)C#CC(N)(N)N	6epu_decoy_17
CC(O)(S)C(N)(O)C(N)(N)C#CC#CC#CN	6epu_decoy_18
CC(O)(S)C(N)(O)C#CC#CC(N)(N)C#CN	6epu_decoy_19
CC(O)(S)C(N)(O)C#CC(N)(N)C#CC#CN	6epu_decoy_20
CC(O)(S)C(N)(N)C(N)(O)C#CC#CC#CN	6epu_decoy_21
CC(O)(S)C(N)(N)C#CC#CC(N)(O)C#CN	6epu_decoy_22
CC(O)(S)C(N)(N)C#CC(N)(O)C#CC#CN	6epu_decoy_23
CC(O)(S)C#CC#CC(N)(N)C(N)(O)C#CN	6epu_decoy_24
CC(O)(S)C#CC#CC(N)(O)C(N)(N)C#CN	6epu_decoy_25
